# Supplementary material for: The Effect of Different Doses of Norepinephrine on Microcirculation in ICU Septic Patients: A Prospective Observational Study
Source: Research Square preprint supplement (doi:10.21203/rs.3.rs-8376468/v1), 2025-12-30
Supplement: Supplementary file 1 [file b6e6259003baa947e554f8b1.docx]

Supplement Table 1

The spearman correlation coefficients between NE and microcirculatory parameters

| Parameters | Correlation Coefficient | *p* Value | FDR-Corrected *p* Value |
| --- | --- | --- | --- |
| CRT | 0.144 | 0.249 | 0.249 |
| PI | -0.24 | 0.052 | 0.078 |
| Lac | 0.606 | <0.001 | <0.001 |
| Mottling Score | 0.373 | 0.002 | 0.008 |
| MFI | -0.366 | 0.003 | 0.007 |
| PPV | -0.344 | 0.004 | 0.008 |
| HI | 0.345 | 0.004 | 0.008 |
| TVD | -0.179 | 0.150 | 0.169 |
| PVD | -0.211 | 0.089 | 0.115 |
